# Supplementary material for: The Mutational Robustness of Influenza A Virus
Source: PLoS Pathog. 2016 Aug 29;12(8):e1005856. doi: 10.1371/journal.ppat.1005856 (PMC5003363; doi:10.1371/journal.ppat.1005856)
Supplement: S1 Table — (XLSX) [file ppat.1005856.s003.xlsx]

## Sheet: Mutagenic Primers
Primer name: segment_mutation_direction	Sequence 5'-3'	Primer set	Primer design method (manually designed, R script)	Mutagenesis method (QuikChange, Overlap extension, not used)
WSN/33_HA_23_A1338G_For	GGGTTTCTGGACATTTGGGCATATAATGCAGAATTGTTAG	3	R script	not used
WSN/33_HA_23_A1338G_Rev	CTAACAATTCTGCATTATATGCCCAAATGTCCAGAAACCC	3	R script	not used
WSN/33_HA_28_C254G_For	GGGGAAATGTAACATGACCGGATGGCTCTTGG	3	R script	not used
WSN/33_HA_28_C254G_Rev	CCAAGAGCCATCCGGTCATGTTACATTTCCCC	3	R script	not used
WSN/33_HA_29_T1196A_For	GCACACAAAATGCCATAAACGGGATTACAAACAAGGTG	3	R script	not used
WSN/33_HA_29_T1196A_Rev	CACCTTGTTTGTAATCCCGTTTATGGCATTTTGTGTGC	3	R script	not used
WSN/33_HA_34_A222G_For	CTATGTAAATTAAAAGGAGTAGCCCCACTACAATTGGGG	3	R script	not used
WSN/33_HA_34_A222G_Rev	CCCCAATTGTAGTGGGGCTACTCCTTTTAATTTACATAG	3	R script	not used
WSN/33_HA_35_A769C_For	CATGGGAGGATGAACTATTCCTGGACCTTGCTAGAACCC	3	R script	not used
WSN/33_HA_35_A769C_Rev	GGGTTCTAGCAAGGTCCAGGAATAGTTCATCCTCCCATG	3	R script	not used
WSN/33_HA_44_A126G_For	CGAACAACTCAACCGACGCTGTTGACACAATACTC	3	R script	not used
WSN/33_HA_44_A126G_Rev	GAGTATTGTGTCAACAGCGTCGGTTGAGTTGTTCG	3	R script	not used
WSN/33_HA_47_G1289T_For	CAACAACTTAGAAAAAAGTATGGAAAATTT	3	manually designed	not used
WSN/33_HA_47_G1289T_Rev	AAATTTTCCATACTTTTTTCTAAGTTGTTG	3	manually designed	not used
WSN/33_HA_48_G1610T_For	GAAATTGGAATCAATGGGGGTTTATCAGATTCTGGCGATCTAC	3	R script	not used
WSN/33_HA_48_G1610T_Rev	GTAGATCGCCAGAATCTGATAAACCCCCATTGATTCCAATTTC	3	R script	not used
WSN/33_HA_49_C1058A_For	CATCCCATCCATTCAATAAAGAGGTCTATTTGGAGCC	3	R script	not used
WSN/33_HA_49_C1058A_Rev	GGCTCCAAATAGACCTCTTTATTGAATGGATGGGATG	3	R script	not used
WSN/33_HA_A1376G_For	GTTCTACTGGAAAATGAGAGGACTTTGGATTTCCATGAC	2	R script	not used
WSN/33_HA_A1376G_Rev	GTCATGGAAATCCAAAGTCCTCTCATTTTCCAGTAGAAC	2	R script	not used
WSN/33_HA_A534T_For	GAAATTTGCTATGGCTGTCGAAGAAGGGGGATTC	2	R script	not used
WSN/33_HA_A534T_Rev	GAATCCCCCTTCTTCGACAGCCATAGCAAATTTC	2	R script	not used
WSN/33_NA_15_A1370T_For	GCTGAGTTGCCGTTCACCTTTGACAAGTAGTTTGTTC	3	R script	not used
WSN/33_NA_15_A1370T_Rev	GAACAAACTACTTGTCAAAGGTGAACGGCAACTCAGC	3	R script	not used
WSN/33_NS_A417C_For	GGATAAGAACATCATACTGCAAGCGAACTTCAGTGTG	2	R script	not used
WSN/33_NS_A417C_Rev	CACACTGAAGTTCGCTTGCAGTATGATGTTCTTATCC	2	R script	not used
WSN/33_HA_26_C822T_For	GAGGCAACTGGTAATTTAATAGCACCATGG	3	manually designed	Overlap extension
WSN/33_HA_26_C822T_Rev	CCATGGTGCTATTAAATTACCAGTTGCCTC	3	manually designed	Overlap extension
WSN/33_HA_33_G1292A_For	CAACAACTTAGAAAAAAGGATAGAAAATTTAAATAAAAAAGTTGATGATGGG	3	manually designed	Overlap extension
WSN/33_HA_33_G1292A_Rev	CCCATCATCAACTTTTTTATTTAAATTTTCTATCCTTTTTTCTAAGTTGTTG	3	manually designed	Overlap extension
WSN/33_HA_39_T1299C_For	GGATGGAAAATCTAAATAAAAAAGTTGATGATGGG	3	manually designed	Overlap extension
WSN/33_HA_39_T1299C_Rev	CCCATCATCAACTTTTTTATTTAGATTTTCCATCC	3	manually designed	Overlap extension
WSN/33_HA_46_C231G_For	GTAAATTAAAAGGAATAGCCCCAGTACAATTGGGGAAATGTAACATC	3	manually designed	Overlap extension
WSN/33_HA_46_C231G_Rev	GATGTTACATTTCCCCAATTGTACTGGGGCTATTCCTTTTAATTTAC	3	manually designed	Overlap extension
WSN/33_M_C174G_For	GAATGGCTAAAGACAAGACGAATCCTGTCACCTCTGAC	2	R script	Overlap extension
WSN/33_M_C174G_Rev	GTCAGAGGTGACAGGATTCGTCTTGTCTTTAGCCATTC	2	R script	Overlap extension
WSN/33_M_G551A_For	CCAATCCACTAATCAGACATAAGAACAGAATGGTTCTAGCC	2	R script	Overlap extension
WSN/33_M_G551A_Rev	GGCTAGAACCATTCTGTTCTTATGTCTGATTAGTGGATTGG	2	R script	Overlap extension
WSN/33_PB1_A581C_For	GGAGATCACAACTCATTTTCCGAGAAAGAGACGAGTGAGAG	2	R script	Overlap extension
WSN/33_PB1_A581C_Rev	CTCTCACTCGTCTCTTTCTCGGAAAATGAGTTGTGATCTCC	2	R script	Overlap extension
WSN/33_PB2_A1495C_For	GGGTAGATGAGTATTCCCGCGCGGAGAAGATAGTG	2	R script	Overlap extension
WSN/33_PB2_A1495C_Rev	CACTATCTTCTCCGCGCGGGAATACTCATCTACCC	2	R script	Overlap extension
WSN/33_PB2_A386C_For	GGATGTAATGGAGTCAATGAATAAAGAAGAAATGGAGATC	1	manually designed	Overlap extension
WSN/33_PB2_A386C_Rev	GATCTCCATTTCTTCTTTATTCATTGACTCCATTACATCC	1	manually designed	Overlap extension
WSN/33_PB2_C839A_For	GAAACATAGTAAGAAGAGCCAAAGTATCAGCAGATCCACTAGC	1	R script	Overlap extension
WSN/33_PB2_C839A_Rev	GCTAGTGGATCTGCTGATACTTTGGCTCTTCTTACTATGTTTC	1	R script	Overlap extension
WSN/33_HA_27_A1174T_For	CAGGCTATGCAGCGGATCTAAAAAGCACACAAAATGC	3	R script	Overlap extension
WSN/33_HA_27_A1174T_Rev	GCATTTTGTGTGCTTTTTAGATCCGCTGCATAGCCTG	3	R script	Overlap extension
WSN/33_HA_30_A648C_For	GTCTAGCAGTGATGAGCAACAGCGTCTCTATAGTAATGGAAATGC	3	R script	Overlap extension
WSN/33_HA_30_A648C_Rev	GCATTTCCATTACTATAGAGACGCTGTTGCTCATCACTGCTAGAC	3	R script	Overlap extension
WSN/33_HA_31_A1264C_For	CTCAATTCACAGCTGTGGGTACAGAATTCAACAACTTAG	3	R script	Overlap extension
WSN/33_HA_31_A1264C_Rev	CTAAGTTGTTGAATTCTGTACCCACAGCTGTGAATTGAG	3	R script	Overlap extension
WSN/33_HA_32_C1137A_For	GATGGATGGTATGGTTATCATAATCAGAATGAACAGGGATCAGG	3	R script	Overlap extension
WSN/33_HA_32_C1137A_Rev	CCTGATCCCTGTTCATTCTGATTATGATAACCATACCATCCATC	3	R script	Overlap extension
WSN/33_HA_36_G542T_For	GCTATGGCTGACGAAGAATGGGGATTCATACCCAAAG	3	R script	Overlap extension
WSN/33_HA_36_G542T_Rev	CTTTGGGTATGAATCCCCATTCTTCGTCAGCCATAGC	3	R script	Overlap extension
WSN/33_HA_37_T408A_For	GGGAGCAATTGAGCTCAGTAACATCATTAGAAAGATTCG	3	R script	Overlap extension
WSN/33_HA_37_T408A_Rev	CGAATCTTTCTAATGATGTTACTGAGCTCAATTGCTCCC	3	R script	Overlap extension
WSN/33_HA_40_T1583G_For	GTTGAACAGGGAAAAGATAGAGGGAGTGAAATTGGAATCAATGG	3	R script	Overlap extension
WSN/33_HA_40_T1583G_Rev	CCATTGATTCCAATTTCACTCCCTCTATCTTTTCCCTGTTCAAC	3	R script	Overlap extension
WSN/33_HA_41_A939T_For	CACCCCAGGGAGCTATATACAGCAATCTCCCTTTC	3	R script	Overlap extension
WSN/33_HA_41_A939T_Rev	GAAAGGGAGATTGCTGTATATAGCTCCCTGGGGTG	3	R script	Overlap extension
WSN/33_HA_42_A1512G_For	GTGACAATGAATGCATGGAAGGTGTAAGAAATGGGACTTATG	3	R script	Overlap extension
WSN/33_HA_42_A1512G_Rev	CATAAGTCCCATTTCTTACACCTTCCATGCATTCATTGTCAC	3	R script	Overlap extension
WSN/33_HA_43_A1050C_For	GGACTAAGAAACATCCCATCCCTTCAATACAGAGGTCTATTTG	3	R script	Overlap extension
WSN/33_HA_43_A1050C_Rev	CAAATAGACCTCTGTATTGAAGGGATGGGATGTTTCTTAGTCC	3	R script	Overlap extension
WSN/33_HA_45_G1006T_For	GTGCCCAAAATATGTCAGGATTACCAAATTGAGGATGGTTAC	3	R script	Overlap extension
WSN/33_HA_45_G1006T_Rev	GTAACCATCCTCAATTTGGTAATCCTGACATATTTTGGGCAC	3	R script	Overlap extension
WSN/33_A151T_For	GTCGGAAAAATGATTGATGGATTTGGACGATTCTACATCC	1	R script	QuikChange
WSN/33_A151T_Rev	GGATGTAGAATCGTCCAAATCCATCAATCATTTTTCCGAC	1	R script	QuikChange
WSN/33_C1194A_For	CCCTTGAACTGAGAAGAAGATACTGGGCCATAAG	1	R script	QuikChange
WSN/33_C1194A_Rev	CTTATGGCCCAGTATCTTCTTCTCAGTTCAAGGG	1	R script	QuikChange
WSN/33_G436T_For	GGTGACGATGCAACGTCTGGTCTGACTCAC	1	R script	QuikChange
WSN/33_G436T_Rev	GTGAGTCAGACCAGACGTTGCATCGTCACC	1	R script	QuikChange
WSN/33_H_10_T1599A_For	GATGGAGTGAAATTGGAAACAATGGGGGTGTATCAG	0	R script	QuikChange
WSN/33_HA_1_A1057T_For	CATCCCATCCATTCAATTCAGAGGTCTATTTGGAGC	0	R script	QuikChange
WSN/33_HA_1_A1057T_Rev	GCTCCAAATAGACCTCTGAATTGAATGGATGGGATG	0	R script	QuikChange
WSN/33_HA_10T1599A_Rev	CTGATACACCCCCATTGTTTCCAATTTCACTCCATC	0	R script	QuikChange
WSN/33_HA_24_A1345C_For	CTGGACATTTGGACATATACTGCAGAATTGTTAGTTCTAC	3	manually designed	QuikChange
WSN/33_HA_24_A1345C_Rev	GTAGAACTAACAATTCTGCAGTATATGTCCAAATGTCCAG	3	manually designed	QuikChange
WSN/33_HA_25_T915C_For	GAGTGTAACACGAAGCGTCAAACACCCCAGG	3	R script	QuikChange
WSN/33_HA_25_T915C_Rev	CCTGGGGTGTTTGACGCTTCGTGTTACACTC	3	R script	QuikChange
WSN/33_HA_3_T1466A_For	GCCAAAGAAATCGGAAAAGGGTGTTTTGAGTTCTACC	0	R script	QuikChange
WSN/33_HA_3_T1466A_Rev	GGTAGAACTCAAAACACCCTTTTCCGATTTCTTTGGC	0	R script	QuikChange
WSN/33_HA_38_A699T_For	GTAGCGTCTTCAAATTATTACAGGAGATTCACCCCGG	3	R script	QuikChange
WSN/33_HA_38_A699T_Rev	CCGGGGTGAATCTCCTGTAATAATTTGAAGACGCTAC	3	R script	QuikChange
WSN/33_HA_5_A1143T_For	GGTATGGTTATCATCATCAGTATGAACAGGGATCAGGCTATG	0	R script	QuikChange
WSN/33_HA_5_A1143T_Rev	CATAGCCTGATCCCTGTTCATACTGATGATGATAACCATACC	0	R script	QuikChange
WSN/33_HA_8_A1749C_For	CTGAGATTAGGATTTCAGAAATCTAAGGAAAAACACCCTTGTTTC	0	R script	QuikChange
WSN/33_HA_8_A1749C_Rev	GAAACAAGGGTGTTTTTCCTTAGATTTCTGAAATCCTAATCTCAG	0	R script	QuikChange
WSN/33_HA_A334T_For	CTACATTGTAGAAACACCAATCTCTGAGAATGGAGCATG	2	R script	QuikChange
WSN/33_HA_A334T_Rev	CATGCTCCATTCTCAGAGATTGGTGTTTCTACAATGTAG	2	R script	QuikChange
WSN/33_HA_A784G_For	CTGGACCTTGCTAGGACCCGGAGACAC	2	R script	QuikChange
WSN/33_HA_A784G_Rev	GTGTCTCCGGGTCCTAGCAAGGTCCAG	2	R script	QuikChange
WSN/33_HA_C1229G_For	CAAGGTGAACTCTGTTATGGAGAAAATGAACACTC	2	manually designed	QuikChange
WSN/33_HA_C1229G_Rev	GAGTGTTCATTTTCTCCATAACAGAGTTCACCTTG	2	manually designed	QuikChange
WSN/33_HA_C1696A_For	CAATCAGTTTCTGGATGTGTTATAATGGGTCTTTGCAGTGCAG	2	R script	QuikChange
WSN/33_HA_C1696A_Rev	CTGCACTGCAAAGACCCATTATAACACATCCAGAAACTGATTG	2	R script	QuikChange
WSN/33_HA_C368A_For	GCATGTTATCCAGGAGATCTAATCGACTATGAGGAACTGAG	1	R script	QuikChange
WSN/33_HA_C368A_Rev	CTCAGTTCCTCATAGTCGATTAGATCTCCTGGATAACATGC	1	R script	QuikChange
WSN/33_HA_G1153A_For	CATCAGAATGAACAGGAATCAGGCTATGCAGCGG	1	R script	QuikChange
WSN/33_HA_G1153A_Rev	CCGCTGCATAGCCTGATTCCTGTTCATTCTGATG	1	R script	QuikChange
WSN/33_HA_G1587C_For	CAGGGAAAAGATAGATGGACTGAAATTGGAATCAATGGG	1	R script	QuikChange
WSN/33_HA_G1587C_Rev	CCCATTGATTCCAATTTCAGTCCATCTATCTTTTCCCTG	1	R script	QuikChange
WSN/33_HA_T1663G_For	GTTCACTGGTGCTTTTGGGCTCCCTGGGGGCAATCAG	1	R script	QuikChange
WSN/33_HA_T1663G_Rev	CTGATTGCCCCCAGGGAGCCCAAAAGCACCAGTGAAC	1	R script	QuikChange
WSN/33_HA_T55G_For	GGCAAAACTACTGGTCCGGTTATATGCATTTGTAGC	1	R script	QuikChange
WSN/33_HA_T55G_Rev	GCTACAAATGCATATAACCGGACCAGTAGTTTTGCC	1	R script	QuikChange
WSN/33_HA_T799G_For	GAACCCGGAGACACAAGAATATTTGAGGCAACTG	1	R script	QuikChange
WSN/33_HA_T799G_Rev	CAGTTGCCTCAAATATTCTTGTGTCTCCGGGTTC	1	R script	QuikChange
WSN/33_M_A1009G_For	GTCAACATAGAGCTGGAGTAAAGAACTACCTTGTTTCTAC	2	R script	QuikChange
WSN/33_M_A1009G_Rev	GTAGAAACAAGGTAGTTCTTTACTCCAGCTCTATGTTGAC	2	R script	QuikChange
WSN/33_M_A541C_For	GGTGACAACAACCAATCCACTCATCAGACATGAGAACAGAATG	1	R script	QuikChange
WSN/33_M_A541C_Rev	CATTCTGTTCTCATGTCTGATGAGTGGATTGGTTGTTGTCACC	1	R script	QuikChange
WSN/33_M_G661C_For	CAGGCCAGGCAAATCGTGCAGGCGATGAG	1	R script	QuikChange
WSN/33_M_G661C_Rev	CTCATCGCCTGCACGATTTGCCTGGCCTG	1	R script	QuikChange
WSN/33_M_G936T_For	CCAGAGTCTATGAGGGAATAATATCGAAAGGAACAGC	1	R script	QuikChange
WSN/33_M_G936T_Rev	GCTGTTCCTTTCGATATTATTCCCTCATAGACTCTGG	1	R script	QuikChange
WSN/33_M_T506C_For	GACTCCCAGCATCGGCCTCATAGGCAAATGG	2	R script	QuikChange
WSN/33_M_T506C_Rev	CCATTTGCCTATGAGGCCGATGCTGGGAGTC	2	R script	QuikChange
WSN/33_M_T861G_For	CTTGATCGTCTTTTTTTCAAAGGCATTTATCGTCGCTTTAAATACG	1	manually designed	QuikChange
WSN/33_M_T861G_Rev	CGTATTTAAAGCGACGATAAATGCCTTTGAAAAAAAGACGATCAAG	1	manually designed	QuikChange
WSN/33_NA_11_C389A_For	CTGACTCAAGGCGCCTTAATGAATGACAAGCATTCAAG	3	R script	QuikChange
WSN/33_NA_11_C389A_Rev	CTTGAATGCTTGTCATTCATTAAGGCGCCTTGAGTCAG	3	R script	QuikChange
WSN/33_NA_12_C667A_For	GAGAACACAAGAGTCTGAATGTACATGTGTAAATGGTTCATGTTTTACC	3	R script	QuikChange
WSN/33_NA_12_C667A_Rev	GGTAAAACATGAACCATTTACACATGTACATTCAGACTCTTGTGTTCTC	3	R script	QuikChange
WSN/33_NA_13_G422A_For	CAAGGGGGACCTTTAAGAACAGAAGCCCTTATAGG	3	R script	QuikChange
WSN/33_NA_13_G422A_Rev	CCTATAAGGGCTTCTGTTCTTAAAGGTCCCCCTTG	3	R script	QuikChange
WSN/33_NA_14_G98A_For	GCCTAATATTGCAAATAAGAAATATAATCTCAATATGGATTAGCCATTCAATTCAAACCGG	3	R script	QuikChange
WSN/33_NA_14_G98A_Rev	CCGGTTTGAATTGAATGGCTAATCCATATTGAGATTATATTTCTTATTTGCAATATTAGGC	3	R script	QuikChange
WSN/33_NA_16_T1130G_For	CAGAGACTGATAGTAGGGTCTCTATGAGACAAGATG	3	R script	QuikChange
WSN/33_NA_16_T1130G_Rev	CATCTTGTCTCATAGAGACCCTACTATCAGTCTCTG	3	R script	QuikChange
WSN/33_NA_17_G201C_For	CTATAAAGTTGTTGCTGCGCAGGACTCAACTTCAG	3	R script	QuikChange
WSN/33_NA_17_G201C_Rev	CTGAAGTTGAGTCCTGCGCAGCAACAACTTTATAG	3	R script	QuikChange
WSN/33_NA_18_G1040C_For	GTATGGCAATGGTCTTTGGATAGGAAG	3	R script	QuikChange
WSN/33_NA_18_G1040C_Rev	CTTCCTATCCAAAGACCATTGCCATAC	3	R script	QuikChange
WSN/33_NA_19_G1168T_For	GTGGCAATAACTAATCGTTCAGGGTACAGCGGAAG	3	R script	QuikChange
WSN/33_NA_19_G1168T_Rev	CTTCCGCTGTACCCTGAACGATTAGTTATTGCCAC	3	R script	QuikChange
WSN/33_NA_20_A909C_For	CGACCAAAACCTAGATTATACAATAGGATACATCTGCAGTGG	3	R script	QuikChange
WSN/33_NA_20_A909C_Rev	CCACTGCAGATGTATCCTATTGTATAATCTAGGTTTTGGTCG	3	R script	QuikChange
WSN/33_NA_21_A176C_For	GGAATATGCAACCAAGGCCGCATTACCTATAAAGTTG	3	R script	QuikChange
WSN/33_NA_21_A176C_Rev	CAACTTTATAGGTAATGCGGCCTTGGTTGCATATTCC	3	R script	QuikChange
WSN/33_NA_22_G158A_For	CGGAAATCAAAACCATACTAGAATATGCAACCAAGGCAG	3	R script	QuikChange
WSN/33_NA_22_G158A_Rev	CTGCCTTGGTTGCATATTCTAGTATGGTTTTGATTTCCG	3	R script	QuikChange
WSN/33_NA_23_G141C_For	GCCATTCAATTCAAACCGCAAATCAAAACCATACTGG	3	R script	QuikChange
WSN/33_NA_23_G141C_Rev	CCAGTATGGTTTTGATTTGCGGTTTGAATTGAATGGC	3	R script	QuikChange
WSN/33_NA_24_T334G_For	CATAAGAGAGCCTTTGATTTCATGTTCTCAC	3	R script	QuikChange
WSN/33_NA_24_T334G_Rev	GTGAGAACATGAAATCAAAGGCTCTCTTATG	3	R script	QuikChange
WSN/33_NA_25_A449C_For	CCTTATAGGGCCTTAATGCGCTGCCCTGTCGGTGAAG	3	R script	QuikChange
WSN/33_NA_25_A449C_Rev	CTTCACCGACAGGGCAGCGCATTAAGGCCCTATAAGG	3	R script	QuikChange
WSN/33_NA_26_C454T_For	GGGCCTTAATGAGCTGTCCTGTCGGTGAAGCTC	3	R script	QuikChange
WSN/33_NA_26_C454T_Rev	GAGCTTCACCGACAGGACAGCTCATTAAGGCCC	3	R script	QuikChange
WSN/33_NA_27_G1281T_For	GAGGAGGACGCAATCTTGACTAGTGGGAGCATC	3	R script	QuikChange
WSN/33_NA_27_G1281T_Rev	GATGCTCCCACTAGTCAAGATTGCGTCCTCCTC	3	R script	QuikChange
WSN/33_NA_28_T1400C_For	GTTCAAAAAACTCCTCGTTTCTACT	3	manually designed	QuikChange
WSN/33_NA_28_T1400C_Rev	AGTAGAAACGAGGAGTTTTTTGAAC	3	manually designed	QuikChange
WSN/33_NA_29_A1026T_For	GGGATTTTCATATATGTATGGCAATGGTG	3	manually designed	QuikChange
WSN/33_NA_29_A1026T_Rev	CACCATTGCCATACATATATGAAAATCCC	3	manually designed	QuikChange
WSN/33_NA_30_C109A_For	GAAATATAATATCAATATGGATTAGC	3	manually designed	QuikChange
WSN/33_NA_30_C109A_Rev	GCTAATCCATATTGATATTATATTTC	3	manually designed	QuikChange
WSN/33_NA_31_T668A_For	CAAGAGTCTGAATGTACCAGTGTAAATGGTTCATG	3	manually designed	QuikChange
WSN/33_NA_31_T668A_Rev	CATGAACCATTTACACTGGTACATTCAGACTCTTG	3	manually designed	QuikChange
WSN/33_NA_C700T_For	CATGTTTTACCATAATGACTGATGGCCCAAGTGATGGGC	2	R script	QuikChange
WSN/33_NA_C700T_Rev	GCCCATCACTTGGGCCATCAGTCATTATGGTAAAACATG	2	R script	QuikChange
WSN/33_NA_G1313T_For	GGGAGCATCATTTCTTTTTGTGGTTTGAATAGTGATACTGTAGATTGGTC	2	manually designed	QuikChange
WSN/33_NA_G1313T_Rev	GACCAATCTACAGTATCACTATTCAAACCACAAAAAGAAATGATGCTCCC	2	manually designed	QuikChange
WSN/33_NA_G1355A_For	GGCCAGACGGTGCTAAGTTGCCGTTCACC	2	R script	QuikChange
WSN/33_NA_G1355A_Rev	GGTGAACGGCAACTTAGCACCGTCTGGCC	2	R script	QuikChange
WSN/33_NA_G201C_For	CTATAAAGTTGTTGCTGCGCAGGACTCAACTTCAG	1	R script	QuikChange
WSN/33_NA_G201C_Rev	CTGAAGTTGAGTCCTGCGCAGCAACAACTTTATAG	1	R script	QuikChange
WSN/33_NA_G752C_For	GATCGAGAAGGGGAAGCTTACTAAATCGATAGAGTTG	1	manually designed	QuikChange
WSN/33_NA_G752C_Rev	CAACTCTATCGATTTAGTAAGCTTCCCCTTCTCGATC	1	manually designed	QuikChange
WSN/33_NA_G968T_For	CCCAAAGATGGAACATGCAGCTGTGGCCCAG	2	R script	QuikChange
WSN/33_NA_G968T_Rev	CTGGGCCACAGCTGCATGTTCCATCTTTGGG	2	R script	QuikChange
WSN/33_NA_T1070G_For	GGACTAAAAGTGACAGTGCCAGACATGGGTTTGAG	1	R script	QuikChange
WSN/33_NA_T1070G_Rev	CTCAAACCCATGTCTGGCACTGTCACTTTTAGTCC	1	R script	QuikChange
WSN/33_NA_T1162C_For	GATGTTGTGGCAATAACCAATCGGTCAGGGTACAG	1	R script	QuikChange
WSN/33_NA_T1162C_Rev	CTGTACCCTGACCGATTGGTTATTGCCACAACATC	1	R script	QuikChange
WSN/33_NA_T1340G_For	GTGATACTGTAGATTGGTCTGGGCCAGACGGTGCTGAGTTG	1	R script	QuikChange
WSN/33_NA_T1340G_Rev	CAACTCAGCACCGTCTGGCCCAGACCAATCTACAGTATCAC	1	R script	QuikChange
WSN/33_NA_T693C_For	GGTTCATGTTTTACCACAATGACCGATGGCCCAAG	2	R script	QuikChange
WSN/33_NA_T693C_Rev	CTTGGGCCATCGGTCATTGTGGTAAAACATGAACC	2	R script	QuikChange
WSN/33_NP_A1160T_For	GCTTCCAATGAAAACATGGTGACTATGGAATCAAGTACC	2	R script	QuikChange
WSN/33_NP_A1160T_Rev	GGTACTTGATTCCATAGTCACCATGTTTTCATTGGAAGC	2	R script	QuikChange
WSN/33_NP_A1229T_For	GACCAGAAGTGGAGGGATCACCAATCAACAGAGGG	2	R script	QuikChange
WSN/33_NP_A1229T_Rev	CCCTCTGTTGATTGGTGATCCCTCCACTTCTGGTC	2	R script	QuikChange
WSN/33_NP_A1505G_For	CATGAGTAATGAAGGATCTTGTTTCTTCGGAGACAATGCAG	2	R script	QuikChange
WSN/33_NP_A1505G_Rev	CTGCATTGTCTCCGAAGAAACAAGATCCTTCATTACTCATG	2	R script	QuikChange
WSN/33_NP_A425G_For	CCAAGCTAATAATGGTGGCGATGCAACGGCTGGTC	2	R script	QuikChange
WSN/33_NP_A425G_Rev	GACCAGCCGTTGCATCGCCACCATTATTAGCTTGG	2	R script	QuikChange
WSN/33_NP_A454C_For	CGGCTGGTCTGACTCACATGCTGATCTGGCACTCCAATTTG	2	R script	QuikChange
WSN/33_NP_A454C_Rev	CAAATTGGAGTGCCAGATCAGCATGTGAGTCAGACCAGCCG	2	R script	QuikChange
WSN/33_NP_C1485A_For	GATCGTGCCCTCCTTTGAAATGAGTAATGAAGGATC	1	R script	QuikChange
WSN/33_NP_C1485A_Rev	GATCCTTCATTACTCATTTCAAAGGAGGGCACGATC	1	R script	QuikChange
WSN/33_NP_C485T_For	CTCCAATTTGAATGATGCAATTTACCAGAGGACAAGAGCTC	2	R script	QuikChange
WSN/33_NP_C485T_Rev	GAGCTCTTGTCCTCTGGTAAATTGCATCATTCAAATTGGAG	2	R script	QuikChange
WSN/33_NP_T198G_For	CCGAACTTAAACTCAGTGAGTATGAGGGACGGCTGATTC	1	R script	QuikChange
WSN/33_NP_T198G_Rev	GAATCAGCCGTCCCTCATACTCACTGAGTTTAAGTTCGG	1	R script	QuikChange
WSN/33_NP_T521C_For	CTTGTTCGCACAGGAACGGATCCCAGGATGTGC	1	R script	QuikChange
WSN/33_NP_T521C_Rev	GCACATCCTGGGATCCGTTCCTGTGCGAACAAG	1	R script	QuikChange
WSN/33_NS_A809G_For	CATTTATGCAAGCCTTACGACTATTGCTTGAAGTGGAG	1	R script	QuikChange
WSN/33_NS_A809G_Rev	CTCCACTTCAAGCAATAGTCGTAAGGCTTGCATAAATG	1	R script	QuikChange
WSN/33_NS_G227T_For	GAAAGCAAATAGTGGAGCGTATTCTGAAGGAAGAATCTG	1	R script	QuikChange
WSN/33_NS_G227T_Rev	CAGATTCTTCCTTCAGAATACGCTCCACTATTTGCTTTC	1	R script	QuikChange
WSN/33_NS_G648T_For	GCTTGGAGAAGCAGTAATTAGAATGGGAGACCTCCAC	2	R script	QuikChange
WSN/33_NS_G648T_Rev	GTGGAGGTCTCCCATTCTAATTACTGCTTCTCCAAGC	2	R script	QuikChange
WSN/33_NS_G650C_For	GGAGAAGCAGTAATGACAATGGGAGACCTCCAC	2	R script	QuikChange
WSN/33_NS_G650C_Rev	GTGGAGGTCTCCCATTGTCATTACTGCTTCTCC	2	R script	QuikChange
WSN/33_NS_T51A_For	CCAAACACTGTGTCAAGCATTCAGGTAGATTGCTTTC	1	R script	QuikChange
WSN/33_NS_T51A_Rev	GAAAGCAATCTACCTGAATGCTTGACACAGTGTTTGG	1	R script	QuikChange
WSN/33_PA_A1358T_For	CAAGCATGAGAAGGAATTTTTTCACAGCAGAGGTGTC	1	R script	QuikChange
WSN/33_PA_A1358T_Rev	GACACCTCTGCTGTGAAAAAATTCCTTCTCATGCTTG	1	R script	QuikChange
WSN/33_PA_A263T_For	GCACAGATTTGAAATAATCGTGGGAAGAGATCGCACAATAG	2	R script	QuikChange
WSN/33_PA_A263T_Rev	CTATTGTGCGATCTCTTCCCACGATTATTTCAAATCTGTGC	2	R script	QuikChange
WSN/33_PA_A88G_For	CTTGCGGAAAAGGCAATGGAAGAGTATGGAGAGGACC	1	R script	QuikChange
WSN/33_PA_A88G_Rev	GGTCCTCTCCATACTCTTCCATTGCCTTTTCCGCAAG	1	R script	QuikChange
WSN/33_PA_A92G_For	CTTGCGGAAAAGGCAATGAAAGGGTATGGAGAGGACCTGAAAATC	2	R script	QuikChange
WSN/33_PA_A92G_Rev	GATTTTCAGGTCCTCTCCATACCCTTTCATTGCCTTTTCCGCAAG	2	R script	QuikChange
WSN/33_PA_C1324A_For	GATTGGAGAAGATGCGGCTACAATTGAACACATTGCAAG	2	R script	QuikChange
WSN/33_PA_C1324A_Rev	CTTGCAATGTGTTCAATTGTAGCCGCATCTTCTCCAATC	2	R script	QuikChange
WSN/33_PA_C1682A_For	GATATGCTTCTAAGAAGTGACATAGGCCATGTGTCAAGG	1	R script	QuikChange
WSN/33_PA_C1682A_Rev	CCTTGACACATGGCCTATGTCACTTCTTAGAAGCATATC	1	R script	QuikChange
WSN/33_PA_C500T_For	GGAAATGGCCACAAAGGTCGACTACACTCTCGATG	1	R script	QuikChange
WSN/33_PA_C500T_Rev	CATCGAGAGTGTAGTCGACCTTTGTGGCCATTTCC	1	R script	QuikChange
WSN/33_PA_G1041C_For	CAAATTATCTTCTGTCATGGAACCAAGTACTGGCAGAACTGCAGG	1	R script	QuikChange
WSN/33_PA_G1041C_Rev	CCTGCAGTTCTGCCAGTACTTGGTTCCATGACAGAAGATAATTTG	1	R script	QuikChange
WSN/33_PA_G1634C_For	CCAAGACTTGAACCACACAAATCGGAGAAGTACTGTGTTCTTGAG	1	R script	QuikChange
WSN/33_PA_G1634C_Rev	CTCAAGAACACAGTACTTCTCCGATTTGTGTGGTTCAAGTCTTGG	1	R script	QuikChange
WSN/33_PA_G240A_For	CTTGGCGATCCAAATGCACTTTTAAAGCACAGATTTGAAATAATCGAGGG	1	manually designed	QuikChange
WSN/33_PA_G240A_Rev	CCCTCGATTATTTCAAATCTGTGCTTTAAAAGTGCATTTGGATCGCCAAG	1	manually designed	QuikChange
WSN/33_PA_G529C_For	CTCGATGAAGAAAGCAGGCCTAGGATCAAAACCAGGC	2	R script	QuikChange
WSN/33_PA_G529C_Rev	GCCTGGTTTTGATCCTAGGCCTGCTTTCTTCATCGAG	2	R script	QuikChange
WSN/33_PA_T1685C_For	CTTCTAAGAAGTGCCACAGGCCATGTGTCAAGG	2	R script	QuikChange
WSN/33_PA_T1685C_Rev	CCTTGACACATGGCCTGTGGCACTTCTTAGAAG	2	R script	QuikChange
WSN/33_PA_T2123C_For	CTGATTAATGATCCCTGGGCTTTGCTTAATGCTTCTTGG	2	R script	QuikChange
WSN/33_PA_T2123C_Rev	CCAAGAAGCATTAAGCAAAGCCCAGGGATCATTAATCAG	2	R script	QuikChange
WSN/33_PA_T237A_For	CTTGGCGATCCAAATGCACTATTGAAGCACAGATTTG	2	R script	QuikChange
WSN/33_PA_T237A_Rev	CAAATCTGTGCTTCAATAGTGCATTTGGATCGCCAAG	2	R script	QuikChange
WSN/33_PA_T878G_For	GGTCCAAATTCCTGCTGAGGGATGCCTTAAAATTAAG	1	R script	QuikChange
WSN/33_PA_T878G_Rev	CTTAATTTTAAGGCATCCCTCAGCAGGAATTTGGACC	1	R script	QuikChange
WSN/33_PA_T964G_For	CAATCAAATGCATGAGAACAGTCTTTGGATGGAAGGAACCC	2	R script	QuikChange
WSN/33_PA_T964G_Rev	GGGTTCCTTCCATCCAAAGACTGTTCTCATGCATTTGATTG	2	R script	QuikChange
WSN/33_PB1_A1322C_For	CAAAAGAGACACACCACGACTACTTACTGGTGGG	2	R script	QuikChange
WSN/33_PB1_A1322C_Rev	CCCACCAGTAAGTAGTCGTGGTGTGTCTCTTTTG	2	R script	QuikChange
WSN/33_PB1_A2187T_For	GAGGCTATGGTTTCCAGTGCCCGAATTGATGCACG	2	R script	QuikChange
WSN/33_PB1_A2187T_Rev	CGTGCATCAATTCGGGCACTGGAAACCATAGCCTC	2	R script	QuikChange
WSN/33_PB1_A2277C_For	GAAGATCTGTTCCACCATTGACGAGCTCAGACGGCAAAAATAG	1	R script	QuikChange
WSN/33_PB1_A2277C_Rev	CTATTTTTGCCGTCTGAGCTCGTCAATGGTGGAACAGATCTTC	1	R script	QuikChange
WSN/33_PB1_A251C_For	GGCCACTGCCAGAAGCCAATGAACCAAGTGG	1	R script	QuikChange
WSN/33_PB1_A251C_Rev	CCACTTGGTTCATTGGCTTCTGGCAGTGGCC	1	R script	QuikChange
WSN/33_PB1_A728T_For	CAAAGATGCTGAGAGAGGGATGCTAAAACGGAGAGCAATTG	2	R script	QuikChange
WSN/33_PB1_A728T_Rev	CAATTGCTCTCCGTTTTAGCATCCCTCTCTCAGCATCTTTG	2	R script	QuikChange
WSN/33_PB1_C1123T_For	GAAAATTAGAACTTAAATACCTGCAGAAATGCTAGCAAGCATCG	2	manually designed	QuikChange
WSN/33_PB1_C1123T_Rev	CGATGCTTGCTAGCATTTCTGCAGGTATTTAAGTTCTAATTTTC	2	manually designed	QuikChange
WSN/33_PB1_C522T_For	CTGGAAGGCTCATAGACTTTCTTAAGGATGTAATGGAG	1	R script	QuikChange
WSN/33_PB1_C522T_Rev	CTCCATTACATCCTTAAGAAAGTCTATGAGCCTTCCAG	1	R script	QuikChange
WSN/33_PB1_C549T_For	GGATGTAATGGAGTCAATGAATAAAGAAGAAATGGAGATC	1	manually designed	QuikChange
WSN/33_PB1_C549T_Rev	GATCTCCATTTCTTCTTTATTCATTGACTCCATTACATCC	1	manually designed	QuikChange
WSN/33_PB1_G1581T_For	GGGTGTCTGGGATCAACGATTCTGCGGACATGAGTATTG	1	R script	QuikChange
WSN/33_PB1_G1581T_Rev	CAATACTCATGTCCGCAGAATCGTTGATCCCAGACACCC	1	R script	QuikChange
WSN/33_PB1_G1764T_For	GAAATAAAGAAACTGTGTGAGCAAACCCATTCCAAAGCTG	1	R script	QuikChange
WSN/33_PB1_G1764T_Rev	CAGCTTTGGAATGGGTTTGCTCACACAGTTTCTTTATTTC	1	R script	QuikChange
WSN/33_PB1_G599A_For	CAGAGAAAGAGACGAGTGAAAGACAATATGACTAAGAAAATGGTG	1	manually designed	QuikChange
WSN/33_PB1_G599A_Rev	CACCATTTTCTTAGTCATATTGTCTTTCACTCGTCTCTTTCTCTG	1	manually designed	QuikChange
WSN/33_PB1_T1232G_For	GATGGGACTGCATCATGGAGCCCTGGAATGATG	2	R script	QuikChange
WSN/33_PB1_T1232G_Rev	CATCATTCCAGGGCTCCATGATGCAGTCCCATC	2	R script	QuikChange
WSN/33_PB1_T1268G_For	GATGGGCATGTTCAATATGTGAAGTACTGTATTAGGCGTC	2	R script	QuikChange
WSN/33_PB1_T1268G_Rev	GACGCCTAATACAGTACTTCACATATTGAACATGCCCATC	2	R script	QuikChange
WSN/33_PB1_T1288A_For	GTACTGTATTAGGCGTCACCATCCTGAATCTTGG	2	R script	QuikChange
WSN/33_PB1_T1288A_Rev	CCAAGATTCAGGATGGTGACGCCTAATACAGTAC	2	R script	QuikChange
WSN/33_PB1_T675A_For	GAGATTGAACAAAAGGAGTTAACTAATTAGGGCATTAACCCTG	1	manually designed	QuikChange
WSN/33_PB1_T675A_Rev	CAGGGTTAATGCCCTAATTAGTTAACTCCTTTTGTTCAATCTC	1	manually designed	QuikChange
WSN/33_PB2_A1167T_For	CAGAAAAGCAACCAGGAGTTTGATTCAGCTGATAGTG	2	R script	QuikChange
WSN/33_PB2_A1167T_Rev	CACTATCAGCTGAATCAAACTCCTGGTTGCTTTTCTG	2	R script	QuikChange
WSN/33_PB2_A1854G_For	GGATGTGCTTGGGACGTTTGATACCGCTCAG	2	R script	QuikChange
WSN/33_PB2_A1854G_Rev	CTGAGCGGTATCAAACGTCCCAAGCACATCC	2	R script	QuikChange
WSN/33_PB2_A2113C_For	CAGTTCTGAGAGGATTCCTCCTTCTGGGCAAAGAAGACAGG	2	R script	QuikChange
WSN/33_PB2_A2113C_Rev	CCTGTCTTCTTTGCCCAGAAGGAGGAATCCTCTCAGAACTG	2	R script	QuikChange
WSN/33_PB2_A440T_For	CCCTGTCCATTTTAGAAACCTAGTCAAAATACGTCGAAGAG	2	R script	QuikChange
WSN/33_PB2_A440T_Rev	CTCTTCGACGTATTTTGACTAGGTTTCTAAAATGGACAGGG	2	R script	QuikChange
WSN/33_PB2_C532A_For	CATGGAAGTTGTTTTCACTAACGAAGTGGGAGCC	2	R script	QuikChange
WSN/33_PB2_C532A_Rev	GGCTCCCACTTCGTTAGTGAAAACAACTTCCATG	2	R script	QuikChange
WSN/33_PB2_C880T_For	CTTTATTGGAGATGTGCTACAGCACGCAGATTGG	1	R script	QuikChange
WSN/33_PB2_C880T_Rev	CCAATCTGCGTGCTGTAGCACATCTCCAATAAAG	1	R script	QuikChange
WSN/33_PB2_G1660C_For	GGAGATTAATGGTCCTGAATCACTGTTGGTCAATACCTATCAGTG	1	R script	QuikChange
WSN/33_PB2_G1660C_Rev	CACTGATAGGTATTGACCAACAGTGATTCAGGACCATTAATCTCC	1	R script	QuikChange
WSN/33_PB2_T1251C_For	GGCCATGGTATTTTCACAAGAGGACTGTATGATAAAAGCAGTTAGAGGTG	1	manually designed	QuikChange
WSN/33_PB2_T1251C_Rev	CACCTCTAACTGCTTTTATCATACAGTCCTCTTGTGAAAATACCATGGCC	1	manually designed	QuikChange
WSN/33_PB2_T1527A_For	GTGGTGAGCATTGACCGATTTTTGAGAGTTAGGG	1	R script	QuikChange
WSN/33_PB2_T1527A_Rev	CCCTAACTCTCAAAAATCGGTCAATGCTCACCAC	1	R script	QuikChange
WSN/33_PB2_T1559G_For	CCAACGTGGGAATGGACTACTGTCTCCCG	1	R script	QuikChange
WSN/33_PB2_T1559G_Rev	CGGGAGACAGTAGTCCATTCCCACGTTGG	1	R script	QuikChange
WSN/33_PB2_T2255C_For	GGAAACGGAACTCTAGCACACTTACTGACAGCCAGAC	2	R script	QuikChange
WSN/33_PB2_T2255C_Rev	GTCTGGCTGTCAGTAAGTGTGCTAGAGTTCCGTTTCC	2	R script	QuikChange
WSN/33_PB2_T2305C_For	CGGATGGCCATCAATCAGTGTCGAATAGTTTAAAAACG	1	R script	QuikChange
WSN/33_PB2_T2305C_Rev	CGTTTTTAAACTATTCGACACTGATTGATGGCCATCCG	1	R script	QuikChange
WSN/33_PB2_T306A_For	CGAGTGATGGTATCACCACTGGCTGTGACATGGTG	2	R script	QuikChange
WSN/33_PB2_T306A_Rev	CACCATGTCACAGCCAGTGGTGATACCATCACTCG	2	R script	QuikChange

## Sheet: Sequencing Primers
Annealing location	position of first 5' base of primer	primer name	sequence 5'-3'
PHW2000 vector	Vector. 154 bp upstream of 3' terminal RNA	PHW2000_hcmv_m1524	cggtgggaggtctatataagca
PB2	709	WSN33_Seg1_709_For	cattgaagtgttgcatttgacc
PB2	1468	WSN33_seg1_1468_For	cagcaaaatgggggtagatgagta
PB2	2070	PB2.8plasmid2.For	tgaaggcacagctggagttgagtc
PB1	537	WSN33_seg2_537_For	tgggagtcaatgaacaaagaagaa
PB1	1064	WSN33_seg2_1064_For	tcaaacaaaatggcgagactgg
PB1	1890	WSN33_seg2_1890_For	tgaggattaccaggggcgtttatg
PA	676	WSN33_seg3_676_For	gtctcccgccaaacttctccag
PA	1225	WSN33_seg3_1225_For	ggtcgcttgcaagttggattcaga
PA	1944	WSN33_Seg3_1944_For	tggcaaagtcggtattcaacagc
HA	665	HA_1	ggaaatgcttatgtctctgtagcgtc
HA	1095	WSN33_Seg4_1095_For	gggggatggactggaatgataga
HA	1451	HA.1419.For	caaagaaatcggaaatgggtgtt
NP	166	WSN33_seg5_166_For	atccaaatgtgcaccgaactt
NP	677	WSN33_seg5_677_For	atggacggagaacaaggatt
NA	526	WSN33_seg6_526_For	tgatggaatgggctggctaacaa
NA	1034	WSN33_seg6_1034_For	aatggtgtttggataggaaggact
M	333	WSN_33_seg7_333_For	tggggccaaagaaatagcactcag
