# Supplementary material for: The Mutational Robustness of Influenza A Virus
Source: PLoS Pathog. 2016 Aug 29;12(8):e1005856. doi: 10.1371/journal.ppat.1005856 (PMC5003363; doi:10.1371/journal.ppat.1005856)
Supplement: S3 Table — (XLSX) [file ppat.1005856.s005.xlsx]

## Sheet: HA
Mutation	Amino Acid	Fitness	SD	Scaled Site Entropy	Scaled Site Preference	Unscaled Site Entropy	Unscaled Site Preference
U55G	L8R	0	0	2.54079	0.00618073	3.70803	0.0221305
U799G	I256R	0	0	1.74262	0.00159421	2.92907	0.0138427
U915C	C295R	0	0	0.391083	0.0013064	2.49934	0.0165705
C1137A	H369N	0	0	3.09936	0.00868992	3.58227	0.0258032
A1143U	N371Y	0	0	0.48431	0.00170305	2.66192	0.0182196
G1153A	G374E	0	0	0.368456	0.00286229	2.50578	0.0255979
A1345C	N438T	0	0	2.07047	0.0118693	3.50746	0.035071
C231G	L67V	0.712782	0.0345988	1.2814	0.0343041	3.3301	0.0722007
A334U	N101I	0.973842	0.0649139	3.13576	0.0186535	3.92865	0.036086
C368A	L112 (SYN)	0.934478	0.0808325	2.29757	0.469884	3.29479	0.270676
U408A	S126T	0.953179	0.156182	3.82948	0.135567	4.11512	0.0955856
G542U	K170N	1.0069	0.121711	3.7779	0.050543	4.10477	0.0559784
A648C	S206R	0.717845	0.141298	2.9706	0.000328762	3.82923	0.00406472
A699U	N223Y	1.02852	0.103206	3.14368	0.208506	3.75286	0.141455
A784G	E251G	0.942356	0.0398575	4.06833	0.0494786	4.22218	0.0522401
C822U	L264 (SYN)	0.997334	0.0569339	1.86194	0.606526	3.10859	0.341765
A939U	N303Y	0.797843	0.131894	3.78611	0.0408617	4.1304	0.0494524
G1006U	S325I	0.827493	0.0798089	1.08164	0.00668888	3.08519	0.0319383
A1050C	I340L	0.8682	0.0830471	2.88828	0.0469428	3.62152	0.0663485
A1057U	Y342F	0.869555	0.1942	1.61762	0.0658516	3.41004	0.0968581
A1174U	Q381L	0.927465	0.0631965	3.48601	0.0518725	3.83981	0.0622
C1229G	I399M	0.851374	0.101309	1.46415	0.0255409	2.96176	0.0654929
A1264C	K411T	0.646934	0.195194	3.13162	0.0444813	3.90286	0.0585692
G1292A	M420I	1.11982	0.0669219	2.4829	0.0544773	3.70589	0.0736635
U1299C	L423 (SYN)	1.13454	0.272858	1.19844	0.847369	3.3553	0.423556
U1466A	N478K	0.643734	0.139752	2.24819	0.0277211	3.7086	0.0519765
A1512G	S494G	0.870895	0.0362003	3.34865	0.00633462	3.87043	0.0197775
U1583G	D517E	1.00125	0.0171452	4.00555	0.0152411	4.19953	0.0276725
G1587C	V519L	1.06192	0.241944	2.48366	0.173834	3.65316	0.141244
U1599A	S523T	0.876634	0.125738	3.68815	0.0279102	4.10009	0.0408155
C1696A	S555Y	0.733263	0.0144199	3.55365	0.155551	4.01403	0.108655
A1749C	noncoding	ND	ND	ND	ND	ND	ND

## Sheet: NP
Mutation	Amino Acid	Fitness	SD	PR8 Site Entropy	PR8 Site Preference	Aichi Site Entropy	Aichi Site Preference
A151U	I36F	0	0	3.29959	0.0440194	3.78957	0.0876911
U521C	M159T	0	0	2.49686	0.0146065	3.00036	0.0224021
C1194A	S383R	0	0	2.92438	0.0295752	3.57037	0.0112275
A1505G	Y487C	0	0	2.31443	0.0430147	2.49434	0.0288408
U198G	D51E	0.876711	0.0570573	3.61284	0.0611503	3.84053	0.0324325
A425G	D127G	1.00631	0.0731004	4.00808	0.0452114	4.15432	0.0391079
G436U	A131S	0.764837	0.114306	3.52253	0.0417239	3.41058	0.100075
A454C	M137L	0.60236	0.053762	3.05289	0.151867	3.31628	0.0332421
C485U	T147I	1.00152	0.277873	3.18358	0.0845447	3.48483	0.0651007
A1160U	E372V	0.771417	0.0986651	3.43777	0.0634024	3.73104	0.0421283
A1229U	N395I	0.990427	0.0905969	3.63248	0.0920465	3.64467	0.0115783
C1485A	D480E	0.991512	0.0440106	3.63952	0.0958724	3.97875	0.0383654
